# Supplementary material for: Uncertainty Analysis in Humidity Measurements by the Psychrometer Method
Source: MDPI journal article supplement (doi:10.3390/s17020368), 2017-02-14
Supplement: s1 [file s1]

# Supplementary Materials: Uncertainty Analysis in Humidity Measurement by the Psychrometer Method

Jiunyuan Chen and Chiachung Chen

Supplement figures legends

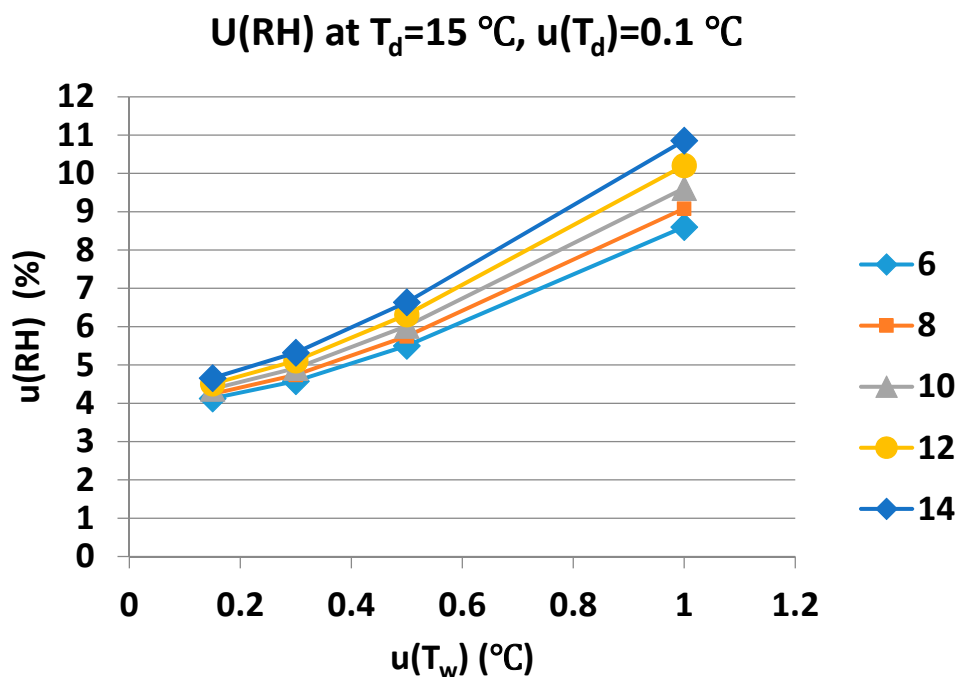

**Figure S1.** Uncertainties of relative humidity calculated with Equation (15) at  $T_d = 15\text{ }^{\circ}\text{C}$ ,  $u(T_d) = 0.10\text{ }^{\circ}\text{C}$ ,  $T_w = 6\sim 14\text{ }^{\circ}\text{C}$  and  $u(T_w) = 0.1\sim 1\text{ }^{\circ}\text{C}$ .

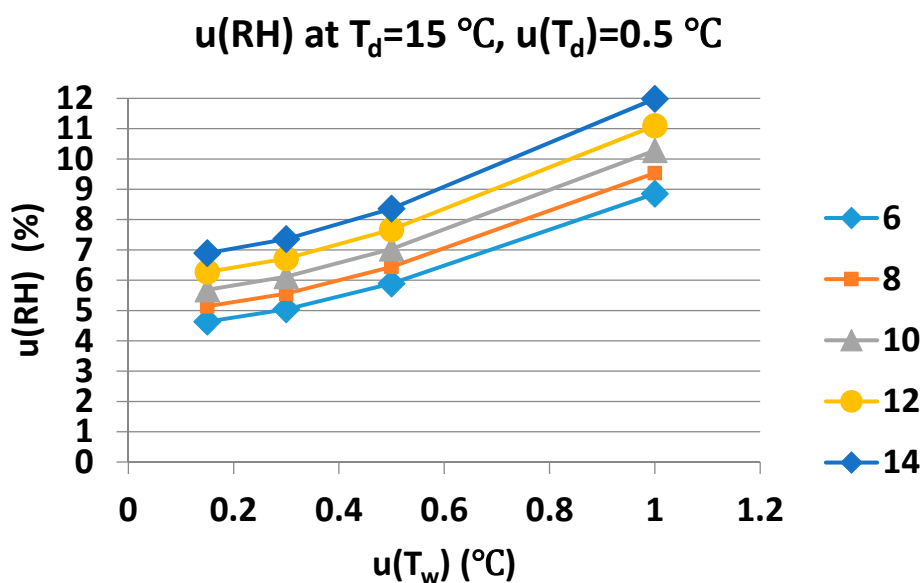

**Figure S2.** Uncertainties of relative humidity calculated with Equation (15) at  $T_d = 15\text{ }^{\circ}\text{C}$ ,  $u(T_d) = 0.50\text{ }^{\circ}\text{C}$ ,  $T_w = 6\sim 14\text{ }^{\circ}\text{C}$  and  $u(T_w) = 0.1\sim 1\text{ }^{\circ}\text{C}$ .

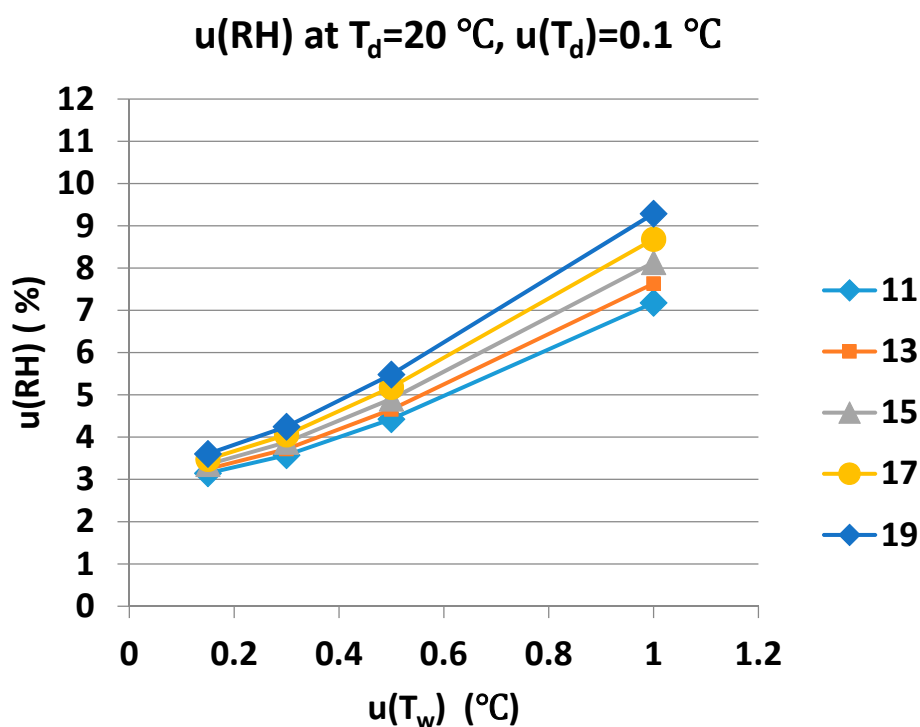

**Figure S3.** Uncertainties of relative humidity calculated with Equation (15) at  $T_d = 20\text{ }^{\circ}\text{C}$ ,  $u(T_d) = 0.10\text{ }^{\circ}\text{C}$ ,  $T_w = 11\sim 19\text{ }^{\circ}\text{C}$  and  $u(T_w) = 0.1\sim 1\text{ }^{\circ}\text{C}$ .

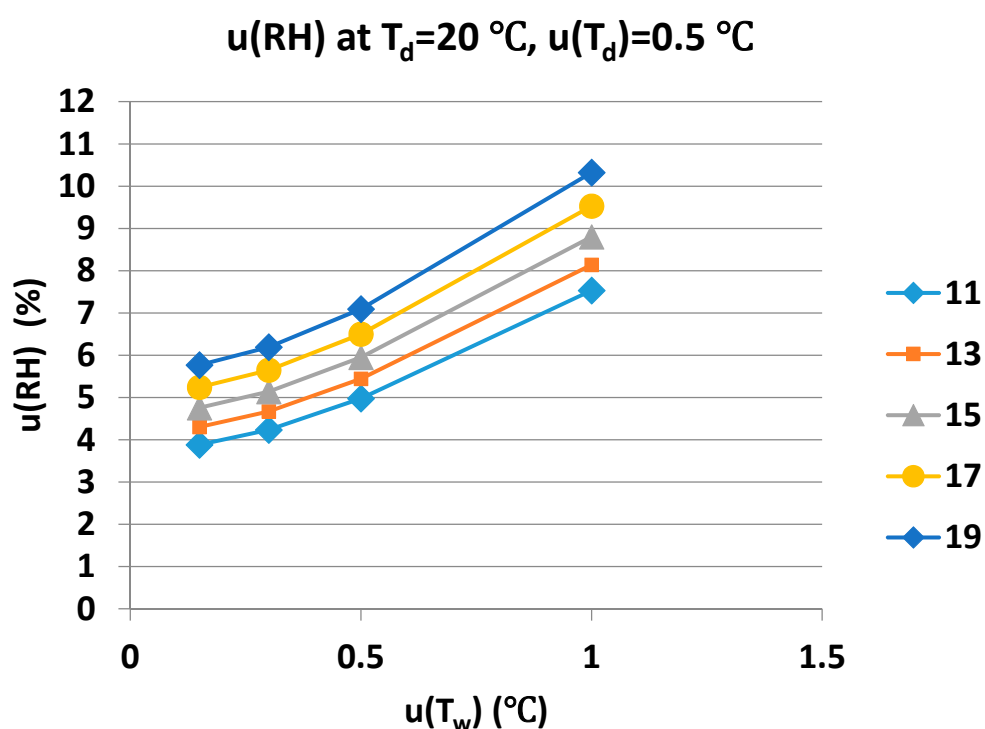

**Figure S4.** Uncertainties of relative humidity calculated with Equation (15) at  $T_d = 20\text{ }^{\circ}\text{C}$ ,  $u(T_d) = 0.50\text{ }^{\circ}\text{C}$ ,  $T_w = 11\sim 19\text{ }^{\circ}\text{C}$  and  $u(T_w) = 0.1\sim 1\text{ }^{\circ}\text{C}$ .

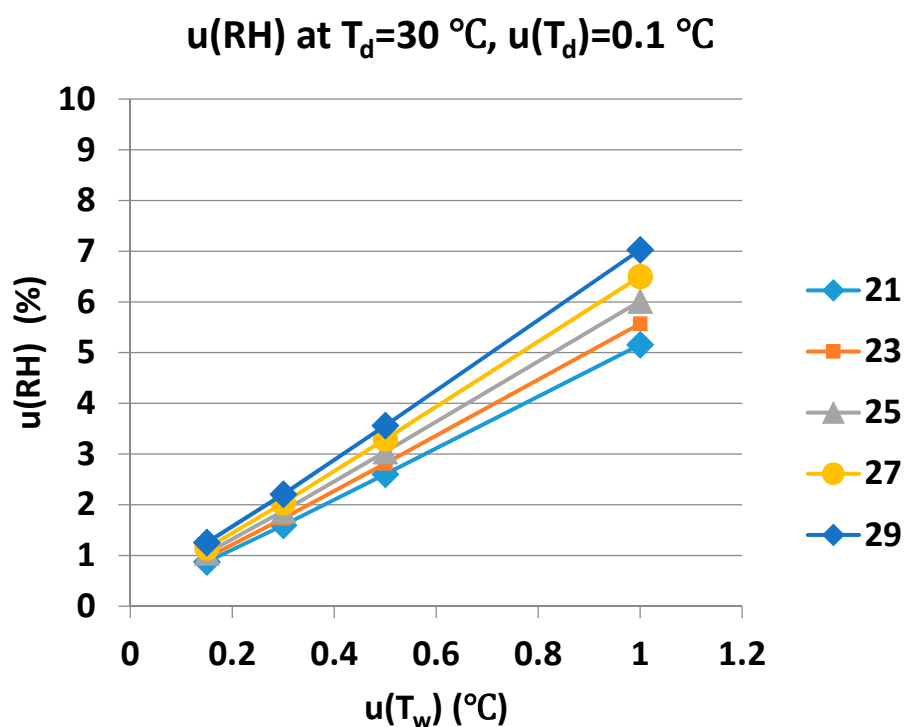

**Figure S5.** Uncertainties of relative humidity calculated with Equation (16) at  $T_d = 30\text{ }^{\circ}\text{C}$ ,  $u(T_d) = 0.10\text{ }^{\circ}\text{C}$ ,  $T_w = 21\sim 29\text{ }^{\circ}\text{C}$  and  $u(T_w) = 0.1\sim 1\text{ }^{\circ}\text{C}$ .

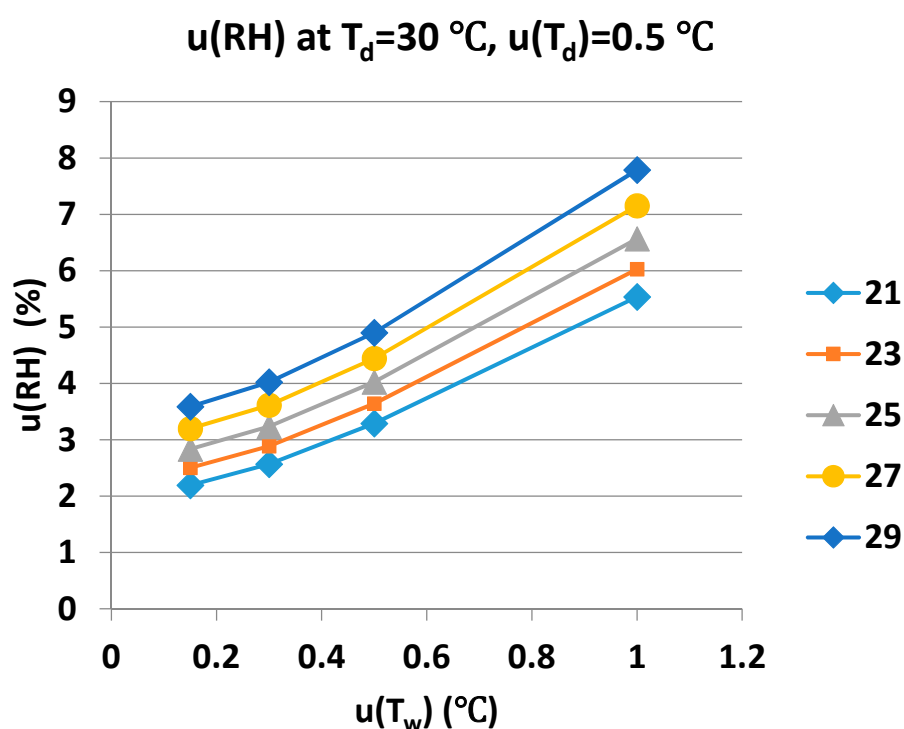

**Figure S6.** Uncertainties of relative humidity calculated with Equation (16) at  $T_d = 30\text{ }^{\circ}\text{C}$ ,  $u(T_d) = 0.50\text{ }^{\circ}\text{C}$ ,  $T_w = 21\sim 29\text{ }^{\circ}\text{C}$  and  $u(T_w) = 0.1\sim 1\text{ }^{\circ}\text{C}$ .

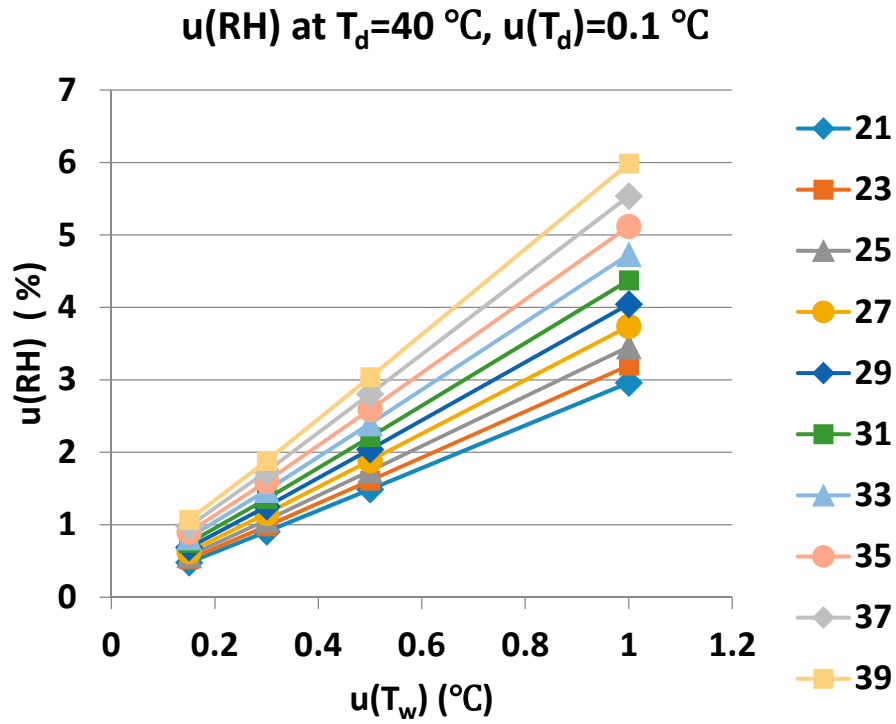

**Figure S7.** Uncertainties of relative humidity calculated with Equation (16) at  $T_d = 40\text{ }^{\circ}\text{C}$ ,  $u(T_d) = 0.10\text{ }^{\circ}\text{C}$ ,  $T_w = 21\sim 39\text{ }^{\circ}\text{C}$  and  $u(T_w) = 0.1\sim 1\text{ }^{\circ}\text{C}$ .

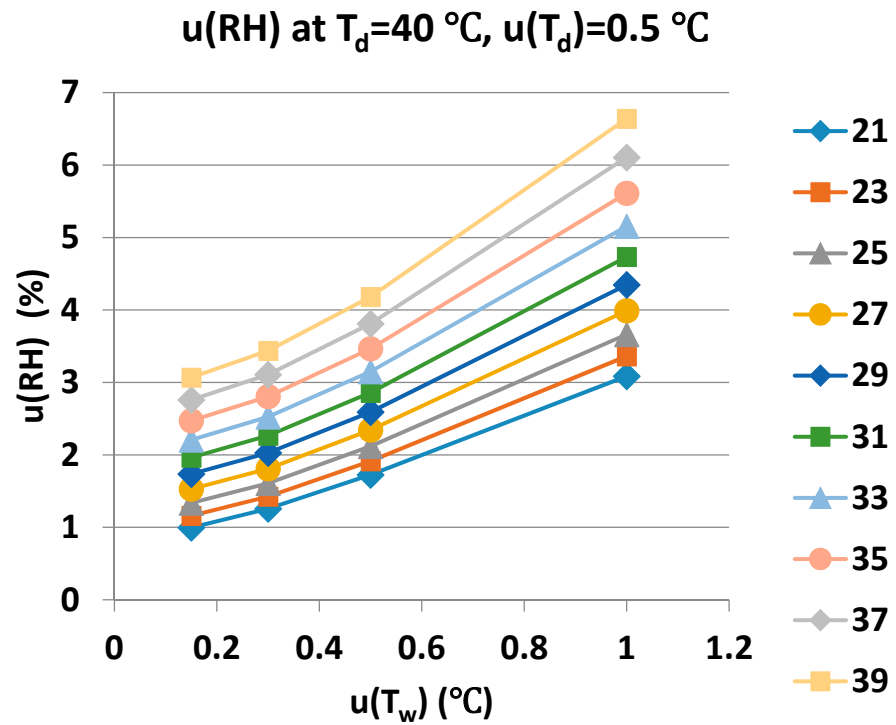

**Figure S8.** Uncertainties of relative humidity calculated with Equation (16) at  $T_d = 40\text{ }^{\circ}\text{C}$ ,  $u(T_d) = 0.50\text{ }^{\circ}\text{C}$ ,  $T_w = 21\sim 39\text{ }^{\circ}\text{C}$  and  $u(T_w) = 0.1\sim 1\text{ }^{\circ}\text{C}$ .
